# Supplementary material for: Carbon nanotubes in benzene: internal and external solvation
Source: Royal Society of Chemistry journal article supplement (doi:10.1039/c0cp01845g), 2011-01-01
Supplement: c0cp01845g.pdf [file c0cp01845g.pdf]

## Supporting Information

### Carbon Nanotubes in Benzene: Internal and External Solvation

#### Simulation methodology and calculations:

Here we present details of our MD simulations of SWNTs in benzene. The simulation cell is comprised of a rigid and immobile SWNT in liquid benzene consisting of 512  $C_6H_6$  molecules. Five different SWNTs in the  $(n, n)$  armchair configuration, i.e.,  $n = 7, 8, 9, 10$  and  $12$ , were considered. As in Ref. 1, both ends of the nanotubes are terminated with hydrogen atoms, modeled by the Lennard-Jones (LJ) parameters  $\epsilon = 15.2$  K and  $\sigma = 0.242$  nm and partial charge  $+0.1 e$ . The C–H bond length employed for the termination is  $0.109$  nm. The C atoms directly bonded to the terminal H atoms have a partial charge  $-0.1 e$ , while all others are assumed to be electrically neutral. The LJ parameters employed for C atoms of the nanotubes are  $\epsilon = 43.2$  K and  $\sigma = 0.340$  nm.<sup>2</sup> During the simulations, the nanotubes were held immobile and rigid with carbon-carbon bond length  $l_{CC} = 0.1415$  nm,<sup>3</sup> and the nanotube length  $h = 3.742$  nm, defined as the end-to-end, hydrogen-to-hydrogen distance. A 12-site all-atom representation was employed to describe benzene. The LJ parameters of benzene were taken from the OPLS-AA force field,<sup>4</sup> while its geometry and partial charges were employed from the work of Kumar and Maroncelli.<sup>5</sup>

The simulations were performed using the DL\_POLY program (version 2.13).<sup>6</sup> Periodic, orthorhombic boundary conditions were employed. The long-range electrostatic interactions were computed via the standard Ewald method.<sup>7</sup> The precision parameter and real space cutoff employed for Ewald calculations were  $10^{-6}$  and  $14$  Å, respectively. The same  $14$  Å was used for the cutoff distance of LJ interactions while the width of the neighbor list was set at  $1.2$  Å. The trajectories were integrated via the Verlet leapfrog algorithm using a time step of  $2$  fs. To determine the density of the combined nanotube-benzene system, we first conducted simulations in the  $NPT$  ensemble at  $298$  K and  $1$  atm for  $2$  ns using the Nosé-Hoover barostat.<sup>8</sup> The time constants used for  $T$  and  $P$  fluctuations were  $0.5$  ps and  $2$  ps, respectively. Benzene molecules were allowed to move in and out of the nanotube during the simulations. The results for the simulation box size determined as an average in the  $NPT$  ensemble are compiled in Table S1. Using these results, we simulated molecular dynamics of the SWNT-benzene systems in the canonical ensemble at  $298$  K employing the Nosé-Hoover thermostat<sup>8,9</sup> with the time constant  $0.5$  ps. The simulations were carried out with  $1$  ns equilibration, followed by a  $4$  ns production run. Angular velocity correlation functions were computed by sampling the trajectory every  $40$  fs. For all other quantities, the trajectory was sampled at the  $1$  ps interval.

Table S1: Simulation box size of the combined  $(n, n)$  nanotube-benzene system

| $n$                | $d_0$ (nm) | $L_x$ | $L_y$ | $L_z$ |
|--------------------|------------|-------|-------|-------|
| 7                  | 0.95       | 39.10 | 39.10 | 50.12 |
| 8                  | 1.08       | 39.12 | 39.12 | 50.13 |
| 9                  | 1.22       | 39.14 | 39.14 | 50.16 |
| 10                 | 1.35       | 39.17 | 39.17 | 50.20 |
| 12                 | 1.62       | 39.30 | 39.30 | 50.40 |
| bulk <sup>a)</sup> |            | 31.80 | 31.80 | 31.80 |

<sup>a)</sup>Pure liquid benzene consisting of 216 benzene molecules.

### Angular velocity autocorrelation function:

Though not presented in our paper, we have also considered angular velocity autocorrelation functions,  $C_{\parallel}^{\omega}(t)$  and  $C_{\perp}^{\omega}(t)$ , and their correlation times

$$\begin{aligned}
C_{\parallel}^{\omega}(t) &= \frac{\sum_i \langle \omega_{i,\parallel}(0) \cdot \omega_{i,\parallel}(t) \rangle}{\sum_i \langle \omega_{i,\parallel}(0) \cdot \omega_{i,\parallel}(0) \rangle} ; & \tau_{\parallel}^{\omega} &= \int_0^{\infty} C_{\parallel}^{\omega}(t) dt, \\
C_{\perp}^{\omega}(t) &= \frac{\sum_i \langle \omega_{i,\perp}(0) \cdot \omega_{i,\perp}(t) \rangle}{\sum_i \langle \omega_{i,\perp}(0) \cdot \omega_{i,\perp}(0) \rangle} ; & \tau_{\perp}^{\omega} &= \int_0^{\infty} C_{\perp}^{\omega}(t) dt,
\end{aligned} \tag{1}$$

where  $\omega_{i,\parallel}$  and  $\omega_{i,\perp}$  are the components of the angular velocity of the  $i$ -th benzene molecule, respectively, parallel and perpendicular to its  $C_6$ -axis in the body-fixed frame. Thus  $C_{\parallel}^{\omega}(t)$  and  $C_{\perp}^{\omega}(t)$  describe rotations about the  $C_6$ -axis (spinning) and  $C_2$ -axes (tumbling), respectively. We note that reorientation of the  $C_6$ -axis of benzene occurs via tumbling, while both spinning and tumbling contribute to reorientations of the  $C_2$ -axes.

The MD results for the angular velocity autocorrelation functions are presented in Fig. S1. The corresponding results for  $\tau_{\parallel}^{\omega}$  and  $\tau_{\perp}^{\omega}$  are compiled in Table S2. Overall the oscillatory behavior of  $C_{\parallel}^{\omega}(t)$  and  $C_{\perp}^{\omega}(t)$  inside the SWNTs is more pronounced than in the bulk. Furthermore, with the exception of (8, 8), the librational character measured as the amplitude and/or duration of these oscillations tends to increase as the pore size decreases. By contrast, the angular velocity relaxation in the bulk is completed without much libration in less than 1 ps for both spinning and tumbling motions [Fig. S1(f)]. This indicates that confinement inside of small micropores enhances the librational character of benzene rotations at short times. In the case of the (8, 8) nanotube in Fig. S1(b), the extremely slow and monotonic decay of  $C_{\parallel}^{\omega}(t)$  without oscillations indicates that its internal benzene molecules undergo free spinning motions. The associated angular velocity correlation time,  $\tau_{\parallel}^{\omega} = 16$  ps, is longer than other correlation times by more than two orders of magnitude. This is due to closely-packed,

columnar  $\pi$ -stacking structure of internal benzene (see Figs. 4 and 5(b) of the main paper), which allows only spinning motions inside (8, 8).

Table S2: MD results for angular velocity correlation times of internal benzene<sup>a)</sup>

| $n$                | $\tau_{\parallel}^{\omega}$ | $\tau_{\perp}^{\omega}$ |
|--------------------|-----------------------------|-------------------------|
| 7                  | 0.063                       | 0.038                   |
| 8                  | 16                          | 0.022                   |
| 9                  | 0.029                       | 0.020                   |
| 10                 | 0.071                       | 0.020                   |
| 12                 | 0.063                       | 0.023                   |
| bulk <sup>b)</sup> | 0.12                        | 0.032                   |

<sup>a)</sup>Units: ps

<sup>b)</sup>In liquid benzene.

## References

- [1] Y. Shim and H. J. Kim, *ACS Nano*, 2009, **3**, 1693–1702.
- [2] G. Hummer, J. C. Rasaiah and J. P. Noworyta, *Nature*, 2001, **414**, 188–190.
- [3] T. W. Odom, J.L. Huang, P. Kim and C. M. Lieber, *Nature*, 1998, **391**, 62–64.
- [4] J. Pranata, S. G. Wierschke and W. L. Jorgensen, *J. Am. Chem. Soc.*, 1991, **113**, 2810–2819.
- [5] P. V. Kumar and M. Maroncelli, *J. Chem. Phys.*, 1995, **103**, 3038–3060.
- [6] T. R. Forester and W. Smith, *DL-POLY 2.13 user manual*, CCLRC, Daresbury Laboratory: Daresbury, Warrington, U.K., 2001.
- [7] D. M. Heyes, *J. Chem. Phys.*, 1982, **74**, 1924–1929.
- [8] W. G. Hoover, *Phys. Rev.* 1985, **A31**, 511–519.
- [9] S. Nose, *J. Chem. Phys.* 1984, **81**, 1695.

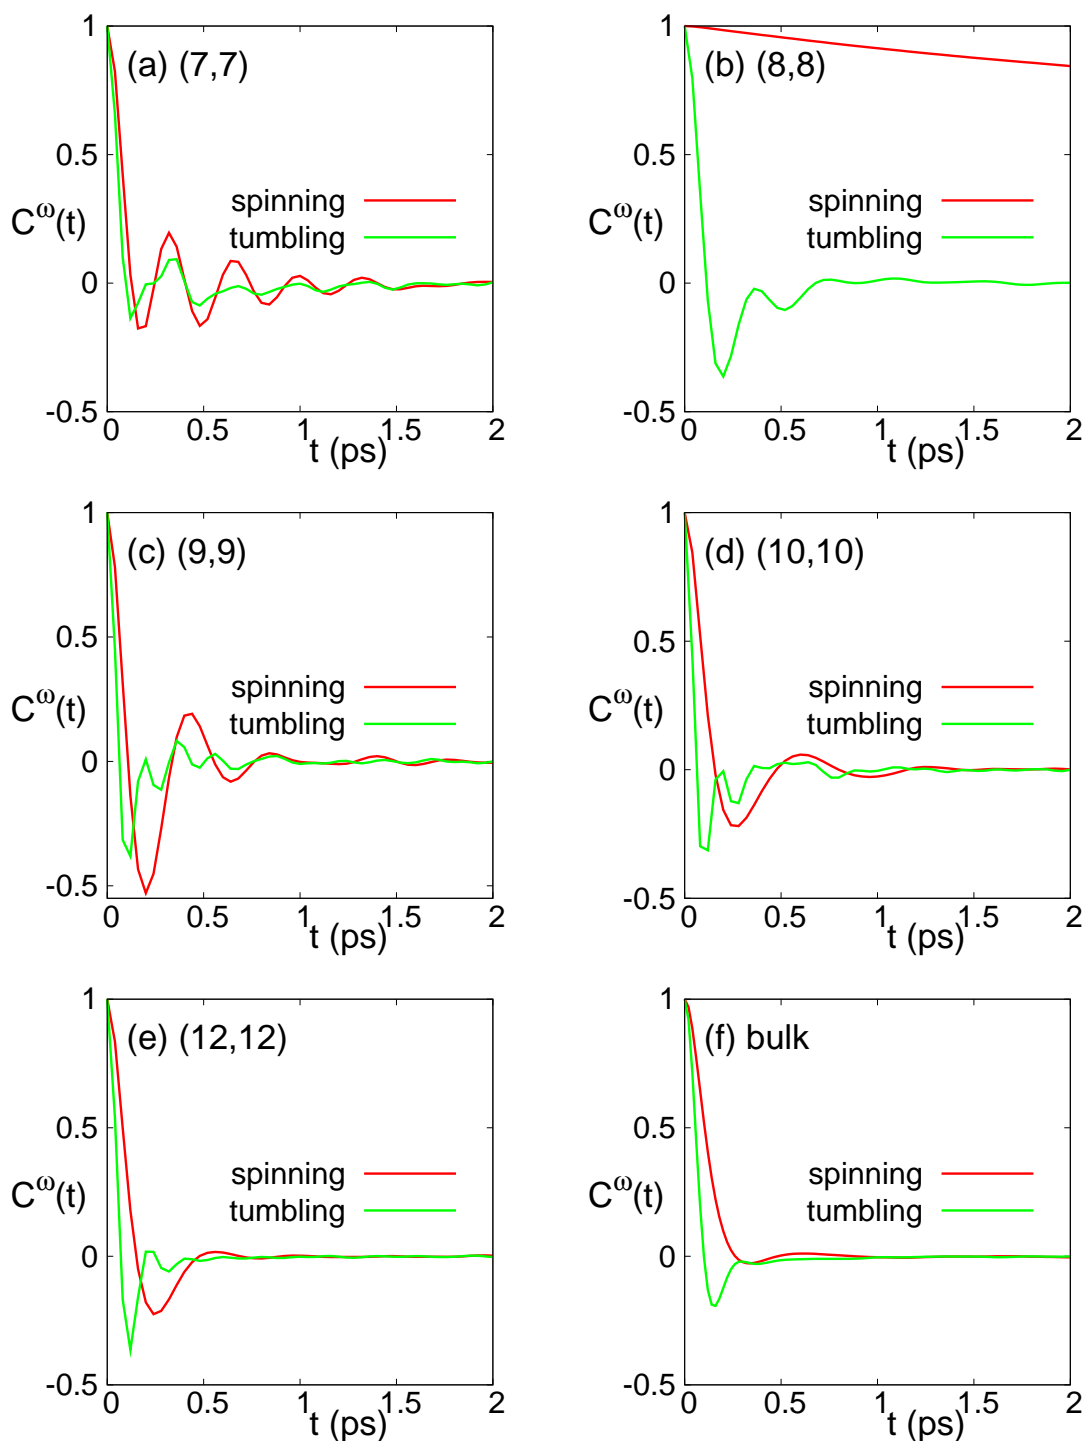

Figure S1: MD results for  $C_{\parallel}^{\omega}(t)$  (spinning) and  $C_{\perp}^{\omega}(t)$  (tumbling) in the interior of  $(n, n)$  SWNTs at 298 K. For comparison,  $C_{\parallel}^{\omega}(t)$  and  $C_{\perp}^{\omega}(t)$  in the bulk liquid are shown in (f).
